# Supplementary material for: Type of the Study: Empirical Study Evaluating Intercultural Competence: A Case Study of an Intercultural Training Program for Traditional Chinese Medicine (TCM) Professionals
Source: Research Square preprint supplement (doi:10.21203/rs.3.rs-6277862/v1), 2025-05-09
Supplement: Supplementary file 1 [file 7808f75714ad11e64e6d5db9.docx]

Appendix

Appendix 1 Satisfaction questionnaire on the First Level

Please help us evaluate this intercultural training program. Your sincere reply will be very helpful for us to carry out this program in the future.

1. The training content is closely related to the subsequent work.

| Strongly Disagree | ○1 | ○2 | ○3 | ○4 | ○5 | Strongly Agree |
| --- | --- | --- | --- | --- | --- | --- |

1. The training content is very interesting.

| Strongly Disagree | ○1 | ○2 | ○3 | ○4 | ○5 | Strongly Agree |
| --- | --- | --- | --- | --- | --- | --- |

1. Trainers have strong communication skills.

| Strongly Disagree | ○1 | ○2 | ○3 | ○4 | ○5 | Strongly Agree |
| --- | --- | --- | --- | --- | --- | --- |

1. Trainer's class preparation is sufficient.

| Strongly Disagree | ○1 | ○2 | ○3 | ○4 | ○5 | Strongly Agree |
| --- | --- | --- | --- | --- | --- | --- |

1. Video or audio materials in the class are very helpful.

| Strongly Disagree | ○1 | ○2 | ○3 | ○4 | ○5 | Strongly Agree |
| --- | --- | --- | --- | --- | --- | --- |

1. The paper materials issued in class are very helpful to me.

| Strongly Disagree | ○1 | ○2 | ○3 | ○4 | ○5 | Strongly Agree |
| --- | --- | --- | --- | --- | --- | --- |

1. I can apply most of what I learned in class to my future work.

| Strongly Disagree | ○1 | ○2 | ○3 | ○4 | ○5 | Strongly Agree |
| --- | --- | --- | --- | --- | --- | --- |

1. The classroom facilities are good.

| Strongly Disagree | ○1 | ○2 | ○3 | ○4 | ○5 | Strongly Agree |
| --- | --- | --- | --- | --- | --- | --- |

1. The schedule is reasonable.

| Strongly Disagree | ○1 | ○2 | ○3 | ○4 | ○5 | Strongly Agree |
| --- | --- | --- | --- | --- | --- | --- |

1. The proportion of teachers' lectures and group participation in the training is appropriate.

| Strongly Disagree | ○1 | ○2 | ○3 | ○4 | ○5 | Strongly Agree |
| --- | --- | --- | --- | --- | --- | --- |

1. I feel this training is very helpful to me.

| Strongly Disagree | ○1 | ○2 | ○3 | ○4 | ○5 | Strongly Agree |
| --- | --- | --- | --- | --- | --- | --- |

What suggestions do you have for this training?

Appendix 2 Interview on the First and Second Level

1. What is your overall evaluation of this training?

3. Do you think this training will help you adapt to life and work abroad in the future? If so, in what aspects?

4. What are the most helpful topics and activities in this training?

5. What do you think of “culture face-to-face” (each time a foreigner is invited) in this training?

6. What do you think of the training team?

7. What suggestions do you have for this training?

Appendix 3 Interview on the Third Level

1. Compared with your previous work experience, do you think this intercultural training is helpful for your overseas work? If yes, could you please give some examples?

2. What new insights do you have about the dissemination of traditional Chinese medicine culture after this intercultural training?

3. How do you feel about your contact with patients and local governments during the overseas work? Have you encountered any difficulties?

4. What suggestions do you have for our intercultural training for traditional Chinese medicine professionals in the future?

Appendix 4 Interview on the Fourth Level

The interview of the dean of SUTCM was face to face and the questions are:

1. How is the feedback of cooperative organizations abroad?
2. Have the trainees’ performance changed when treating foreign patients in China after overseas assignments?
3. Will you consider to provide this training project to TCM professionals continuously in the future planing?

The interview of the dean of one of the dispatched hospitals in Morocco was online and the questions are

1. Are the local patients satisfied with the treatment process of TCM?
2. Are the local doctors satisfied with working with the dispatched doctors?
3. Will you consider the cooperation with Shanghai University of Traditional Chinese Medicine in the future planning.
